# Supplementary figures and images for: Allele-specific demethylation at an imprinted mammalian promoter
Source: PubMed Central journal article supplement — Nucleic Acids Res. 2007 Oct 16;35(20):7031–9. doi: 10.1093/nar/gkm742 (PMC2175309; doi:10.1093/nar/gkm742), 2007-10-16

Figure S1

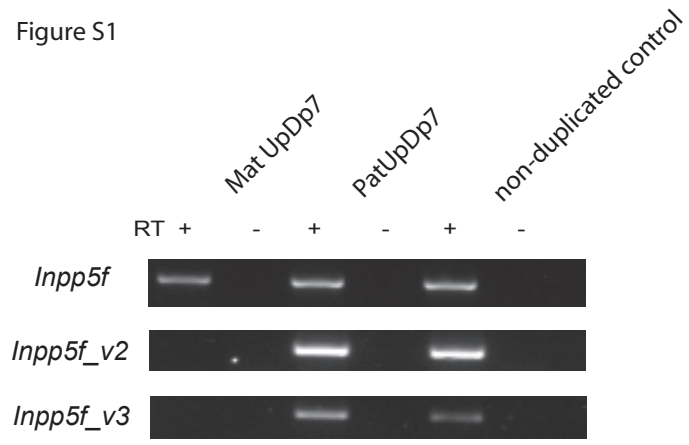

Supplement: nar_gkm742_1.pdf [file nar_gkm742_1.pdf]

Figure S2

A

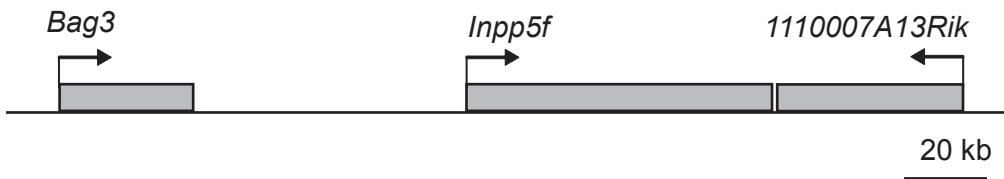

B

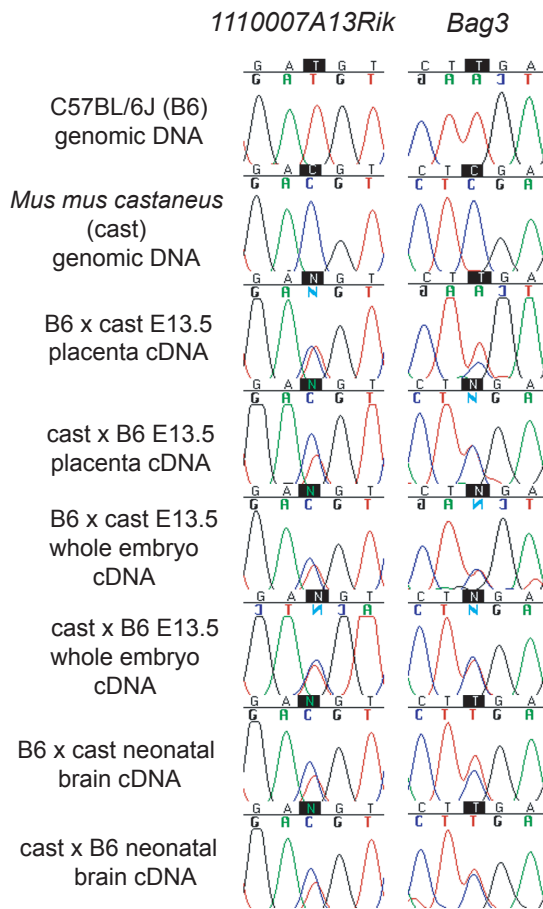

Supplement: nar_gkm742_2.pdf [file nar_gkm742_2.pdf]
